# Supplementary material
Source: publisher figshare collection journal article supplement (https://tandf.figshare.com/ndownloader/files/16837079)
Supplement: Supplementary file 1 [file 16837079]

**Supplement Table 1:** Univariate and stepwise multivariate linear regression analysis of factors associated with aortic-to-brachial PP amplification.

| **Parameter** | **Univariate analysis** | | **Multi-variate analysis** | |
| --- | --- | --- | --- | --- |
| **r** | **P value** | **β** | **P value** |
| Age (years) | -0.224 | **<0.05** | -0.218 | **<0.05** |
| Gender | 0.078 | 0.470 | 0.125 | 0.256 |
| Height (m) | -0.010 | 0.923 | -0.137 | 0.271 |
| BMI (kg/m2) | 0.211 | **<0.05** | 0.146 | 0.153 |
| MAP (mmHg) | -0.069 | 0.520 | -0.201 | **<0.05** |
| Heart rate (beats/min) | 0.313 | **<0.01** | 0.309 | **<0.01** |
| AIx (%) | -0.084 | 0.435 | -0.010 | 0.933 |
| Aortic PWV (m/sec) | -0.086 | 0.425 | -0.006 | 0.963 |
| CI (l/min/m2) | -0.096 | 0.372 | 0.020 | 0.850 |
| ACI (1/100/s2) | -0.097 | 0.370 | -0.091 | 0.371 |
| VI (1/1000/s) | -0.089 | 0.409 | 0.057 | 0.577 |
| LCWI (kg∙m/m2) | -0.067 | 0.536 | -0.053 | 0.619 |
| Pre-ejection period (msec) | -0.065 | 0.548 | -0.053 | 0.611 |
| LVET (msec) | -0.199 | 0.063 | -0.034 | 0.781 |
| SVRI (dyn∙s∙cm-5/m2) | -0.091 | 0.130 | -0.081 | 0.398 |
| TFCI (l/kOhm/m2) | -0.116 | 0.282 | -0.105 | 0.301 |

R2= 0.382 for the stepwise multivariate model

**Abbreviations:** ACI= acceleration index; AIx= augmentation index; BMI= body mass index; CI= Cardiac index; LCWI= left cardiac work index; LVET= left ventricular ejection time; MAP= mean arterial pressure; OR: odds ratio; PWV= pulse wave velocity; SVRI= systemic vascular resistance index; SI= stroke index; TFCI= thoracic fluid content index;

Supplemental Material: Equations of quantified parameters of Impendance Cardiography

| Parameter | Unit | Equation |
| --- | --- | --- |
| Body Surface Area (BSA) | m² | BSA = W 0.425 x H 0.725 x 0.007184 where W is patient's weight in kg and H is patient's height in cm |
| Stroke Volume (SV) | ml | δ x [ (0,17xH)3 /4.2 ] x (dZ/dt)max / Z0  x LVET  Bernstein equation* |
| Stroke Index (SI)  corresponds to stroke volume indexed by BSA | ml/ m2 | SV/BSA |
| Cardiac Output (CO) | L/min | SV x HR |
| Cardiac Index (CI)  corresponds to cardiac output indexed by BSA | L/min/m2 | CO/BSA  or  SI x HR |
| Thoracic Fluid Content (TFC) | /kOhm | 1000/Z0 |
| Thoracic Fluid Content Index (TFCI)  corresponds toTFC indexed by BSA | /kOhm/ m2 | 1000/Z0/BSA |
| Systemic Vascular Resistance (SVR ) | dyne ⋅ sec ⋅cm-5 | [(MAP-CVP)/CO] x 80 |
| Systemic Vascular Resistance Index (SVRI)  corresponds to SVR indexed by BSA | dyne ⋅ sec ⋅ cm-5/m2 | [(MAP-CVP)/CI] x 80 |
| Velocity Index (VI) | /1000/sec | 1000 x dZ/dtmax/Z0  where dZ/dtmax corresponds to the peak blood velocity in the aorta during systole |
| Acceleration Index (ACI) | /100/sec2 | 100 x d2Z/dt2max/  where d2Z/dt2max corresponds to the peak blood acceleration in the aorta during systole |
| Pre-Ejection Period (PEP) | sec | Space · Q(ECG)–B (Fig.1) |
| Left Ventricular Ejection Time (LVET) | sec | Space · B–X (Fig.1) |
| Systolic Time Ratio (STR) | sec | PEP/LVET |
| Left Cardiac Work (LCW) | kg · m | 0.0144 x (MAP – PAOP) x CO |
| Left Cardiac Work Index (LCWI)  corresponds to LCW indexed by BSA | Kg · m/m² | 0.0144 x (MAP – PAOP) x CI |

Z0=basic impendance, MAP: mean arterial pressure, CVP: central venous pressure, SV: stroke volume, PAOP: pulmonary artery occluded pressure

*Modern devices, such as BioZ ICG Monitor CardioDynamics and Cardioscreen 1000 Medis, use the ZMARC algorithm which is modification of the Sramek and Bernstein equation

**References**

Bernstein DP. A new stroke volume equation for thoracic electrical bioimpedance: theory and rationale. Crit Care Med, 1986; 14: 904–909.

Sanidas EA, Grammatikopoulos K, Anastasiadis G, Papadopoulos D, Daskalaki M, Votteas V. Thoracic fluid content and impedance cardiography: a novel and promising noninvasive method for assessing the hemodynamic effects of diuretics in hypertensive patients. *Hellenic J Cardiol* 2009;50(6):465-471.

Van De Water JM, Miller TW, Vogel RL, Mount BE, Dalton ML.

Chest. 2003 Jun;123(6):2028-33. [Impedance cardiography: the next vital sign technology?](https://www.ncbi.nlm.nih.gov/pubmed/12796185)

Greenberg BH, Hermann DD, Pranulis MF, Lazio L, Cloutier D. Reproducibility of impedance cardiography hemodynamic measures in clinically stable heart failure patients. Congest Heart Fail, 2000; 6: 19–26

Strobeck JE, Silver M, Ventura H. Impedance cardiography: Noninvasive measurement of cardiac stroke volume and thoracic fluid content. Congest Heart Fail, 2000; 6: 3–6.

Sageman WS, Riffenburgh RH, Spiess BD. Equivalence of bioimpedance and thermodilution in measuring cardiac index after cardiac surgery. J Cardiothorac Vasc Anesth, 2002; 16: 8–14.

BioZ ICG Monitor User Manual. CardioDynamics, San Diego, CA 2001.

Engoren M, Barbee D. Comparison of cardiac output determined by bioimpedance, thermodilution, and the Fick method. Am J Crit Care, 2005; 14: 40–45.
